# Supplementary material
Source: PubMed Central journal article supplement (PMC6874400)
Supplement: NIHMS1542693-supplement-1.pdf [file NIHMS1542693-supplement-1.pdf]

**Cell Reports, Volume 29**

**Supplemental Information**

**Oligodendrocyte Intrinsic miR-27a**

**Controls Myelination and Remyelination**

**Ajai Tripathi, Christina Volsko, Jessie P. Garcia, Eneritz Agirre, Kevin C. Allan, Paul J. Tesar, Bruce D. Trapp, Goncalo Castelo-Branco, Fraser J. Sim, and Ranjan Dutta**

## Supplemental items:

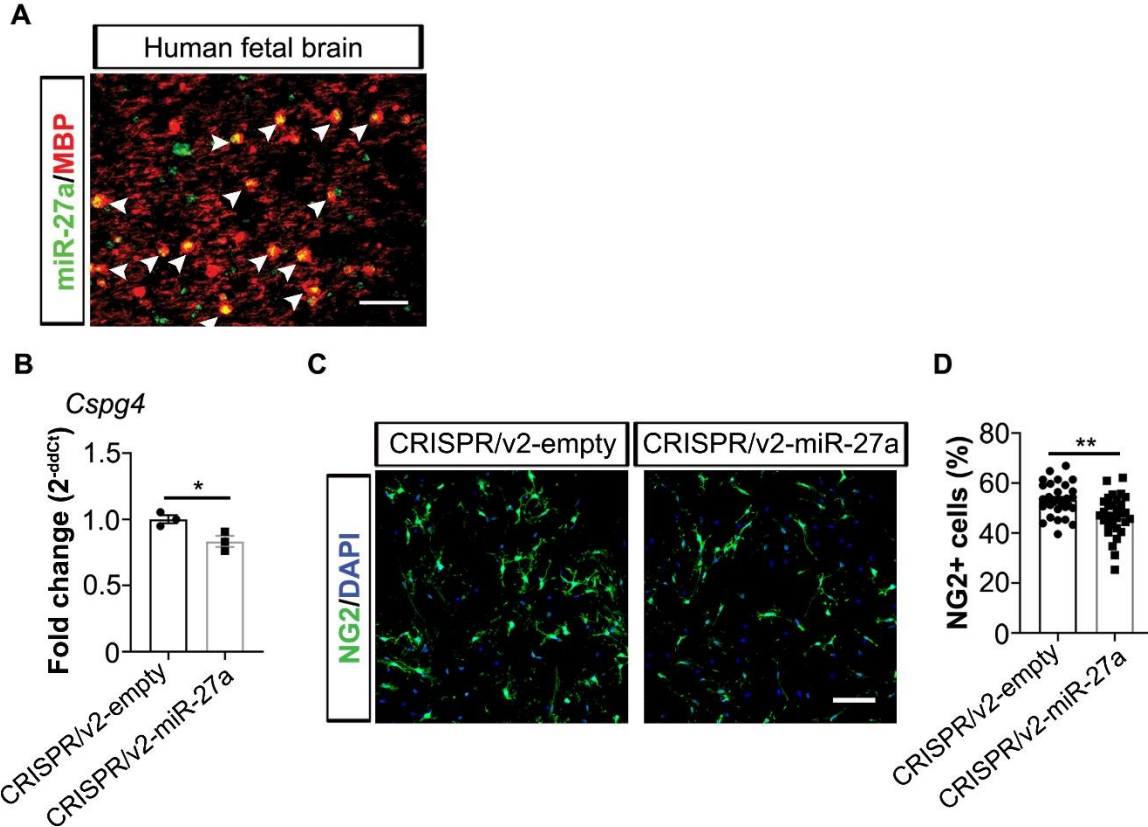

### Figure S1 (related to Figure 1): Importance of miR-27a in OPC lineage development

**(A)** Representative immune-*in situ* hybridization images showing miR-27a (green) and MBP (red) staining of human fetal brain. Scale bar- 50 $\mu$ m.

**(B)** qPCR analysis of *Cspg4* levels in CRISPRv2-empty and CRISPRv2-miR-27a KO mouse EpiSCs-derived OPCs. *Gapdh* was used as an internal control for qPCR analysis. Data represent mean  $\pm$  SEM fold change of 3 independent experiments; \* $P$ <0.05; Student's *t*-test, two-sided.

**(C)** Representative images (from three independently repeated experiments with similar results) of CRISPR/v2 empty (left) and CRISPR/v2-miR-27a KO (right) mouse EpiSCs-derived OPCs showing NG2 expression (right). Scale bar- 100 $\mu$ m.

**(D)** Percentage of NG2+ cells in CRISPRv2-empty and CRISPRv2-miR-27a KO mouse EpiSCs-derived OPCs in proliferation media. Data represent mean  $\pm$  SEM of NG2+ cells from 3 independent experiments; \*\*  $P$ <0.01; Student's *t*-test, two-sided.

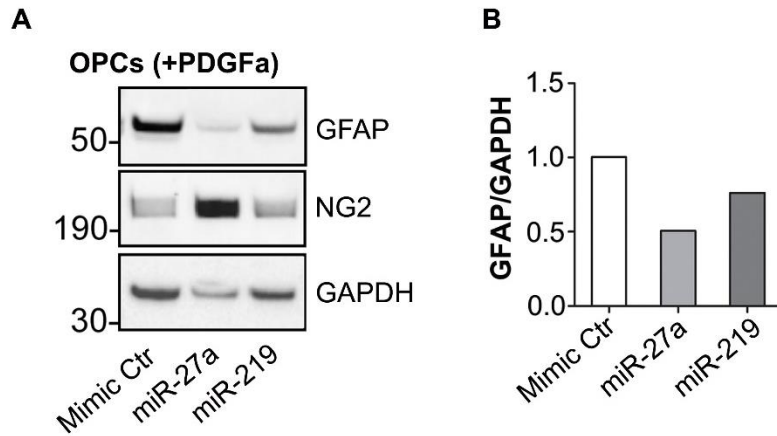

**Figure S2 (related to Figure 2): Analysis of GFAP expression in miR-27a-mimic-transfected mouse OPCs**

**(A)** Western blot image of GFAP and NG2 expression in miRNA mimic (Ctr, miR-27a and miR-219)-transfected mouse OPCs. GAPDH expression was used as a loading control.

**(B)** Quantification of GFAP levels from the western blot analysis of miRNA-mimic transfected OPCs.

**A**

**Gating strategy:**

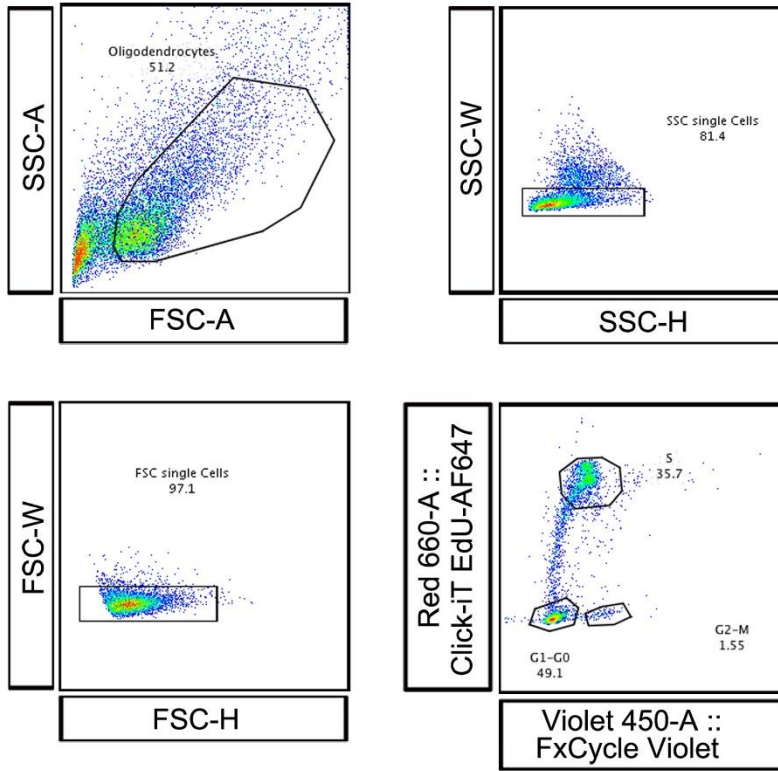

**B**

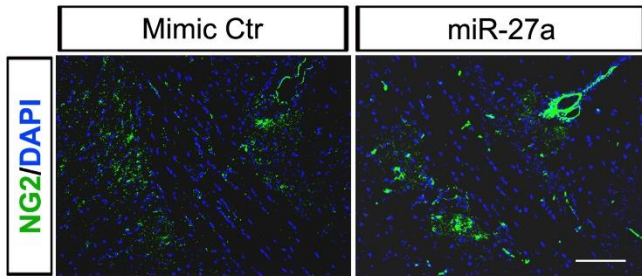

**C**

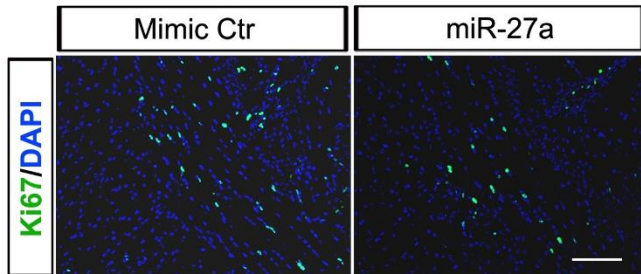

**Figure S3 (related to Figure 3): Increased miR-27a inhibits proliferation of OPCs**

**(A)** Flow cytometry gating strategy for cell proliferation assay to analyze cell populations at different stages of the cell cycle.

**(B, C)** Representative immunohistochemical images (from three mouse brains with similar results) of OPCs (NG2- green, **B**) and proliferating cells (Ki67- green, **C**) in intranasally miRNA mimic (Ctr and miR-27a)-treated P12 mouse brain corpus callosum. Nuclei were stained with DAPI (blue). Scale bar- 50 $\mu$ m.

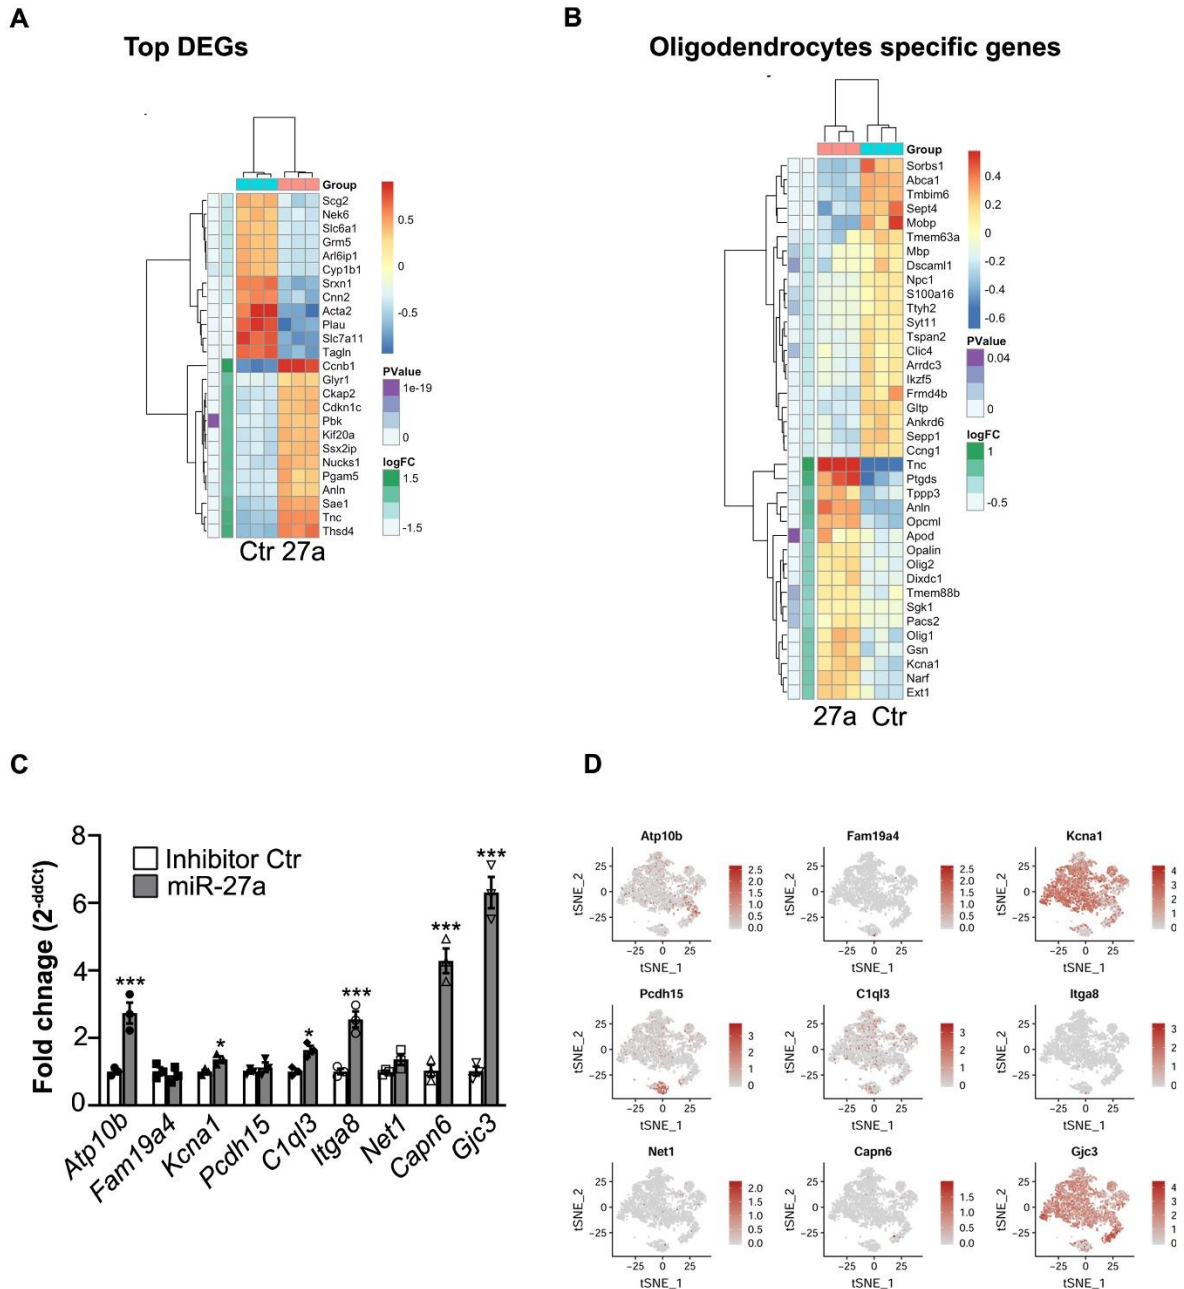

**Figure S4 (related to Figure 4): miR-27a targets OL lineage-specific genes**

**(A)** Heatmap showing differentially expressed genes in miR-27a mimic-transfected mouse OPCs.

**(B)** Heatmap showing upregulated OPC-specific genes and decreased levels of mature OL stage-specific genes in miR-27a mimic-transfected OPCs.

**(C)** qPCR analysis of *Atp10b*, *Fam19a4*, *Kcna1*, *Pcdh15*, *C1ql3*, *Itga8*, *Net1*, *Capn6*, and *Gjc3* levels in OPCs transfected with miR-27a inhibitor. *Gapdh* was used as an internal

control for qPCR analysis. Data represent mean  $\pm$  SEM fold change of 3 independent experiments; \* $P$ <0.05, \*\*\* $P$ <0.001; Two-way ANOVA with Bonferroni's *post hoc* test, multiple comparisons.

**(D)** *t*-SNE projection of cells clusters showing selected enriched gene expression during normal OL lineage development.

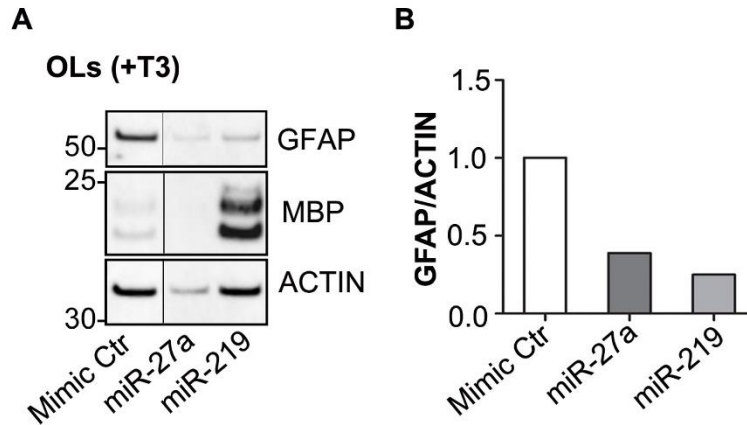

**Figure S5 (related to Figure 5): Analysis of GFAP expression in miR-27a-mimic-transfected differentiated mouse OPCs**

**(A)** Western blot analysis for GFAP and MBP expression in miRNA mimic (Ctr, miR-27a, and miR-219)-transfected mouse OLS. Black vertical line represents break in gel loading with a different sample.

**(B)** Quantification of GFAP levels from western blot analysis of miRNA mimic-transfected OLS.



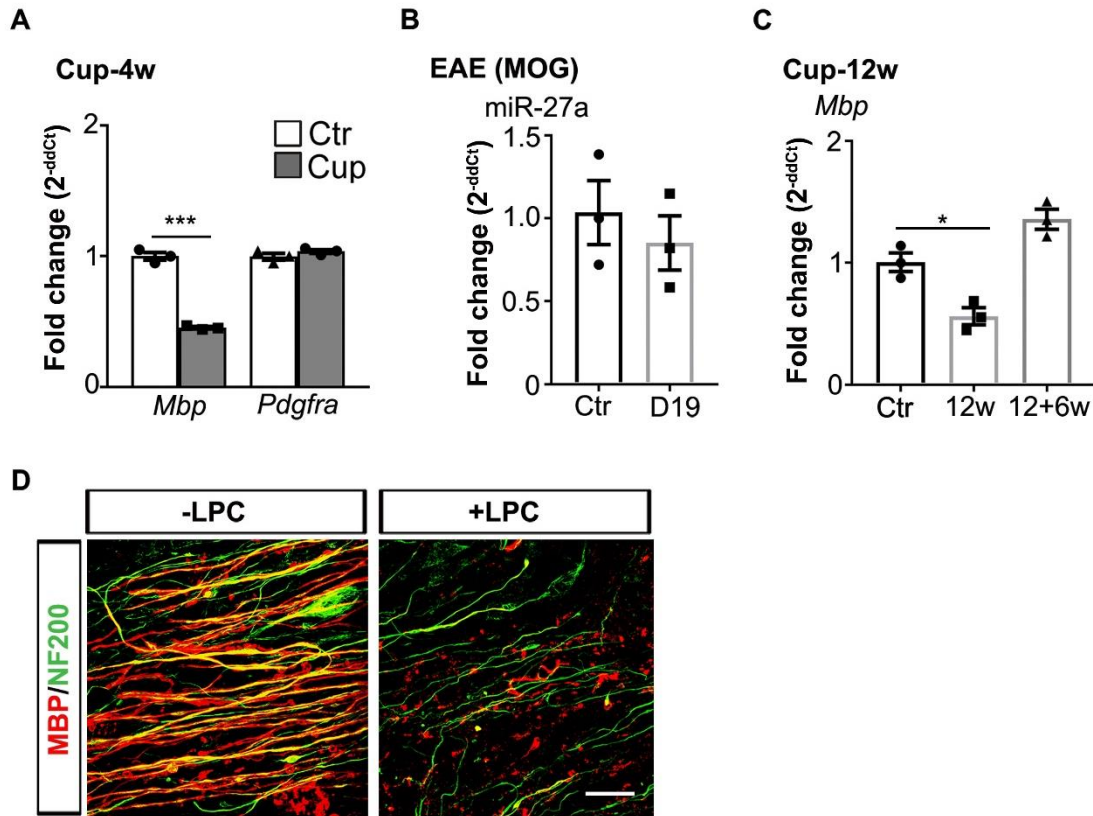

**Figure S6 (related to Figure 7): miR-27a expression during demyelination and remyelination**

**(A)** qPCR analysis of *Mbp* and *Pdgfra* levels in mouse brain corpus callosum (from three different mouse brains) fed cuprizone for 4 weeks (Cup-4w). *Gapdh* was used as an internal control for qPCR analysis. Data represent mean  $\pm$  SEM fold change from 3 different mouse brains; \*\*\* $P$ <0.001; Student's *t*-test, two-sided.

**(B)** qPCR analysis of miR-27a levels at peak of disease (Day 19- D19) in the spinal cords of EAE mice. U6 snoRNA was used as an internal control for qPCR analysis. Data represent mean  $\pm$  SEM fold change from 3 different mouse spinal cord tissues; Student's *t*-test, two-sided.

**(C)** qPCR analysis of *Mbp* levels in mouse brain corpus callosum during demyelination (Cuprizone, 12 weeks, Cup-12w) and remyelination (12+6w). *Gapdh* was used as an internal control for qPCR analysis. Data represent mean  $\pm$  SEM fold change from 3 different mouse brains; \* $P$ <0.05; Student's *t*-test, two-sided.

**(D)** Representative confocal images of myelinated axons (MBP-red, NF200-green) in control and LPC-treated P12 mouse brains, respectively. Scale bar- 20 $\mu$ m.
